# Supplementary material for: Nickel nanoparticles supported on nitrogen-doped honeycomb-like carbon frameworks for effective methanol oxidation
Source: Royal Society of Chemistry journal article supplement (doi:10.1039/c7ra00590c), 2017-01-01
Supplement: c7ra00590c1.pdf [file c7ra00590c1.pdf]

## **Electronic Supplementary Information (ESI)**

### **Nickel nanoparticles supported on nitrogen-doped honeycomb-like carbon frameworks for effective methanol oxidation**

Juan Wang<sup>a</sup>, Qi Zhao<sup>a</sup>, Hongshuai Hou<sup>b</sup>, Yifei Wu<sup>a</sup>, Weizhen Yua, Xiaobo Ji<sup>b\*</sup>,

Lidong shao<sup>a\*</sup>

<sup>a</sup> Shanghai Key Laboratory of Materials Protection and Advanced Materials in Electric Power, Shanghai University of Electric Power, Shanghai 200090, PR China,

E-mail address: lidong.shao@shiep.edu.cn

<sup>b</sup> College of Chemistry and Chemical Engineering Central South University

Changsha, 410083, PR China, E-mail address: xji@csu.edu.cn

**Figure S1**

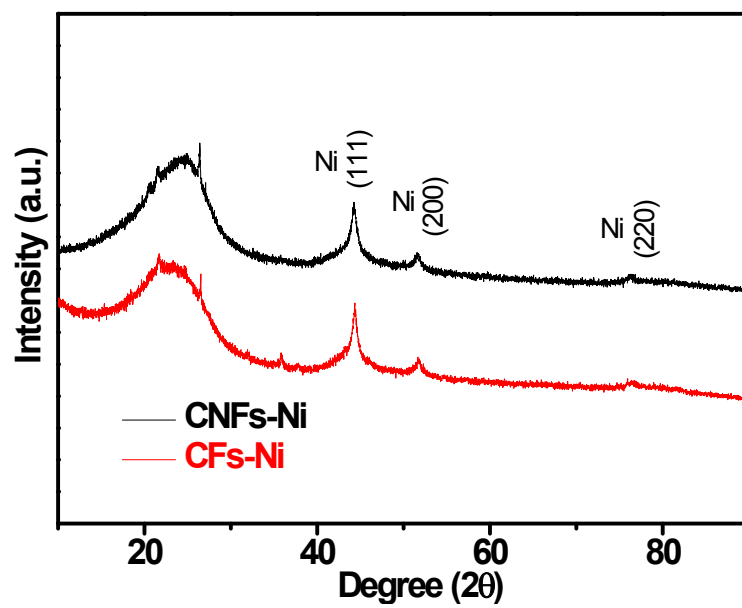

XRD patterns of CNFs-Ni and CFs-Ni.

**Figure S2**

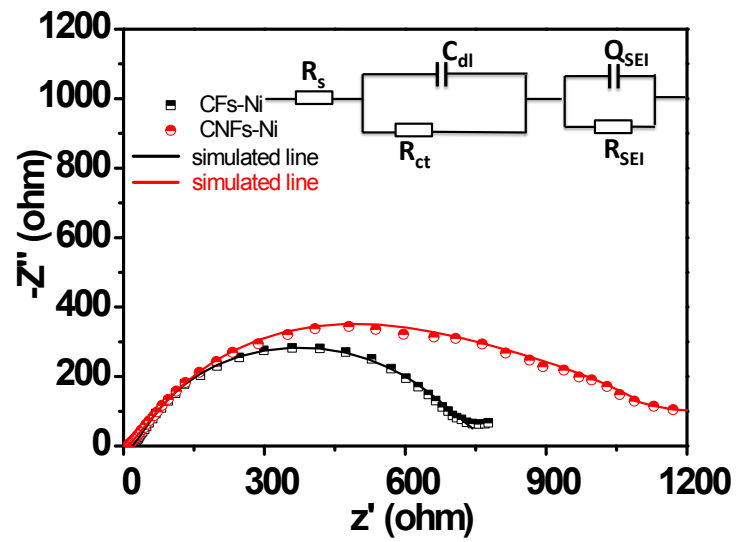

Nyquist plots obtained for CFs-Ni and CNFs-Ni in 1.0 M KOH/0.5 M CH<sub>3</sub>OH. And inset is the equivalent electrical circuit used to fit the EIS data.

Table S1. The parameters of CFs-Ni and CNFs-Ni catalysts for EIS fitting.

| Sample | $R_s$<br>(ohm) | $R_{ct}$<br>(ohm) | $R_{SEI}$<br>(ohm) | $C_{dl}$<br>(F) | $Q_{SEI}$<br>$F s^{(a-1)}$ |
|--------|----------------|-------------------|--------------------|-----------------|----------------------------|
| CF-Ni  | 8.886          | 334.4             | 894.6              | $43.05 e^{-6}$  | $0.2246 e^{-3}$            |
| CNF-Ni | 17.18          | 310               | 352.7              | $47.94 e^{-6}$  | $0.3379 e^{-3}$            |
